# Supplementary material
Source: PubMed Central journal article supplement (PMC3470754)

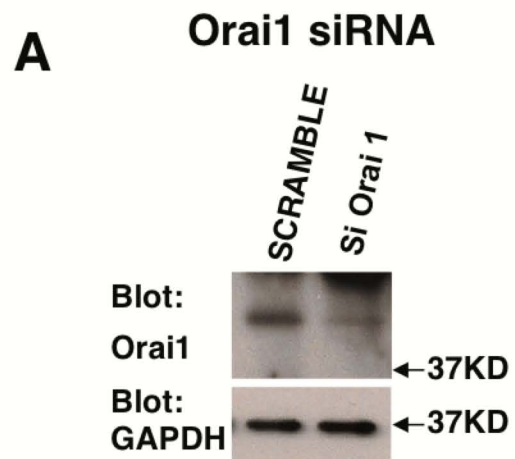

**B** Orai3 overexpression

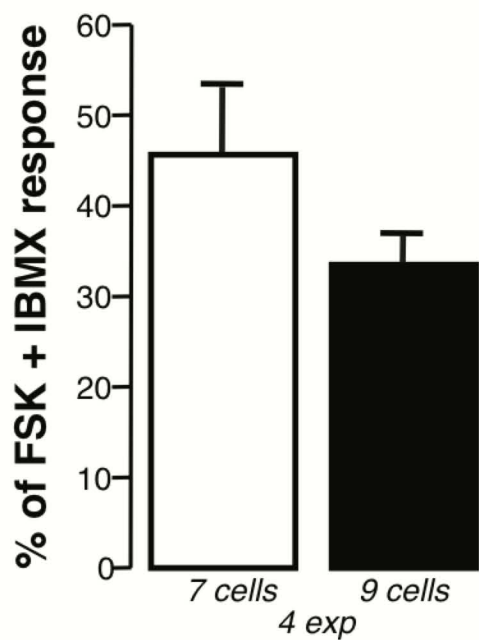

**C** Orai3 + STIM1 overexpression

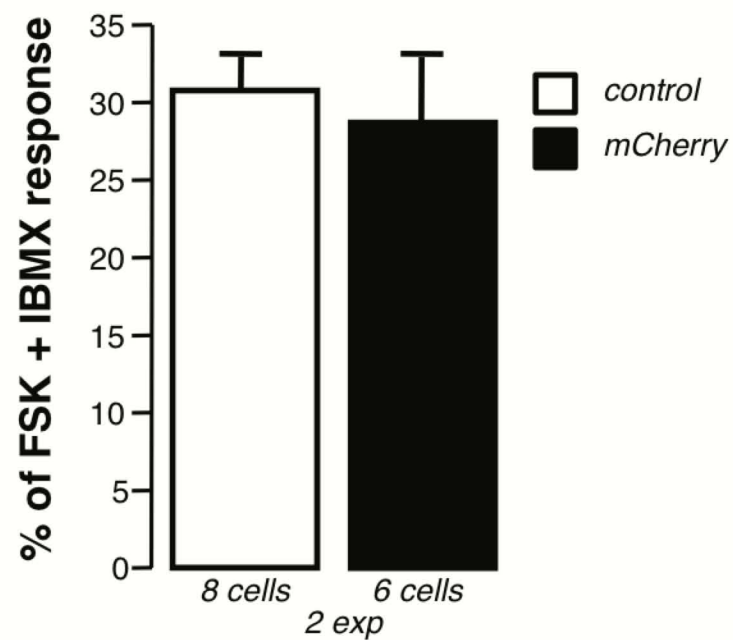

Supplemental Figure 2

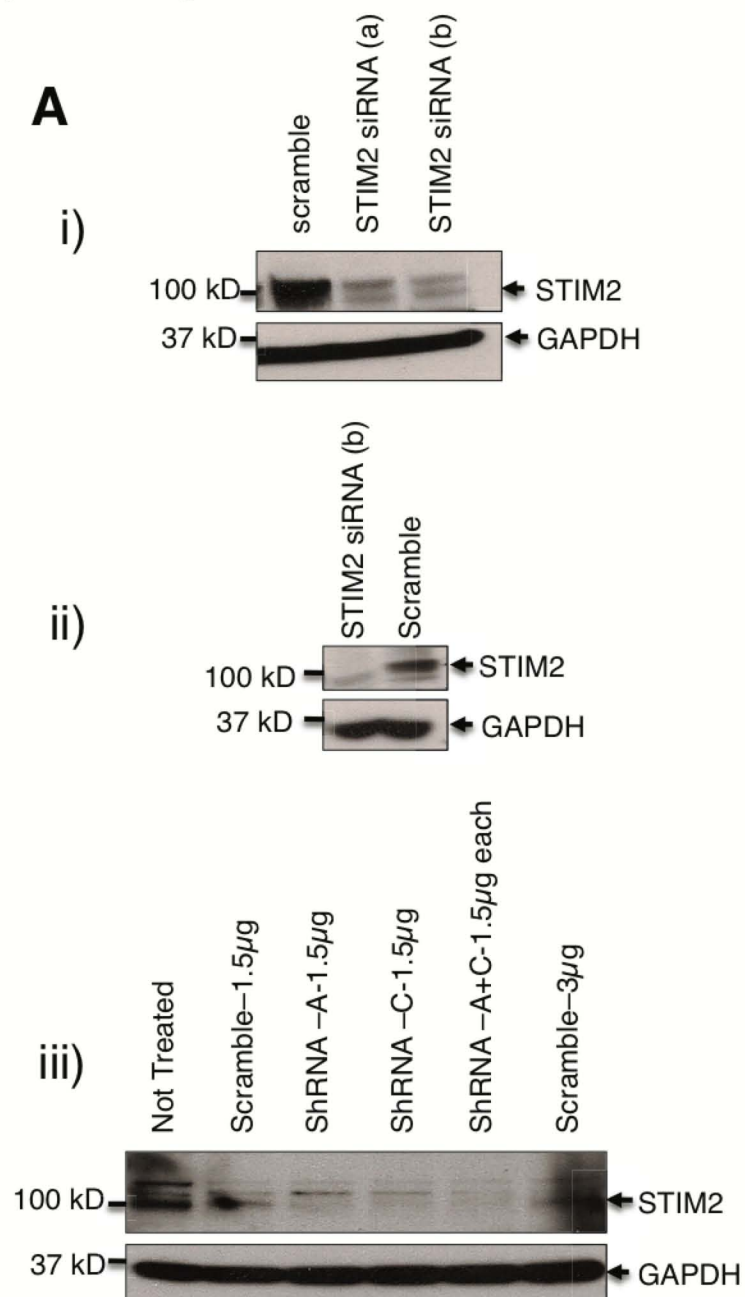

**B**

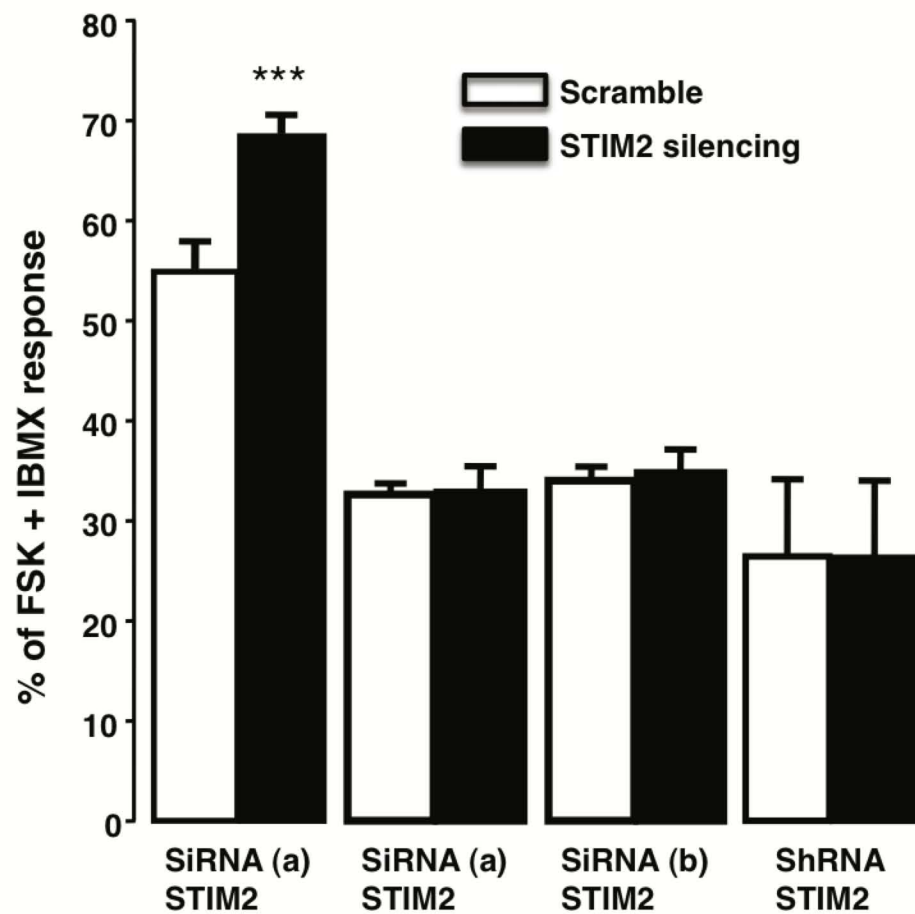

**HeLa cells**  
**AC3 overexpression**

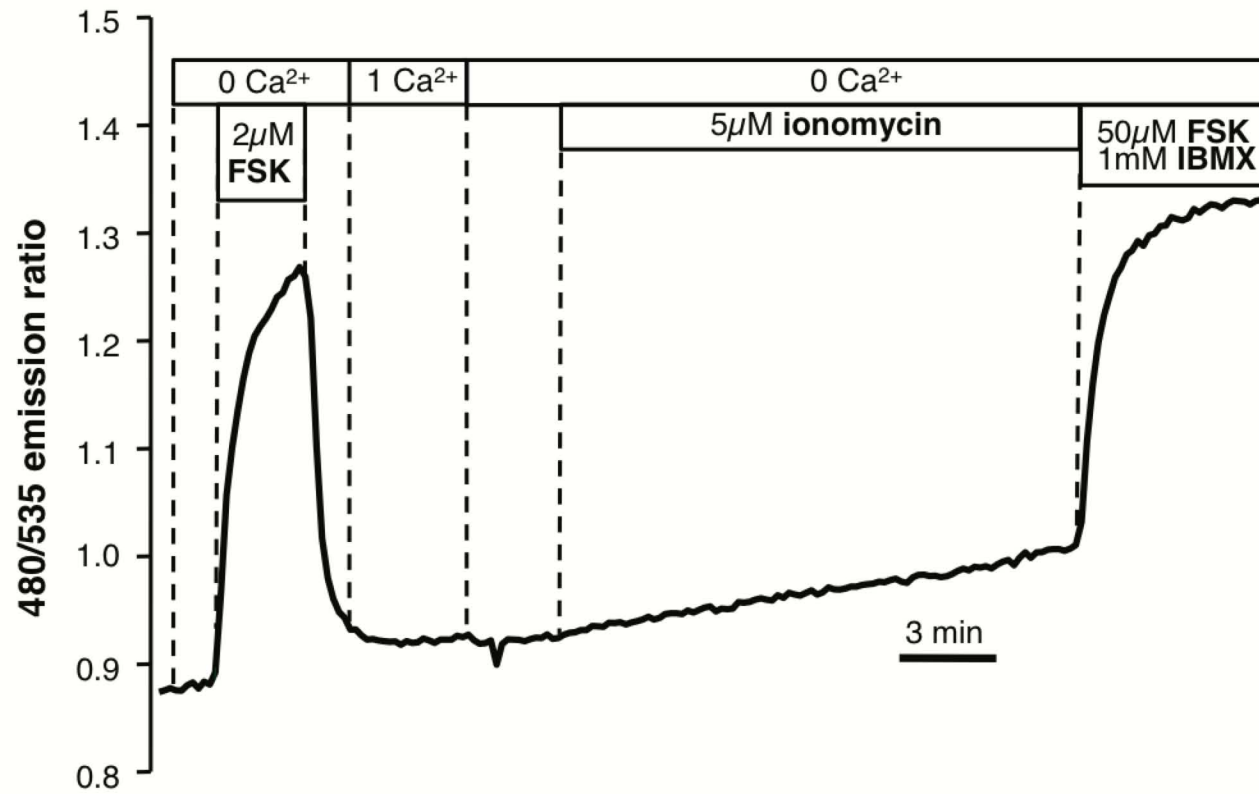

Supplemental Figure 4

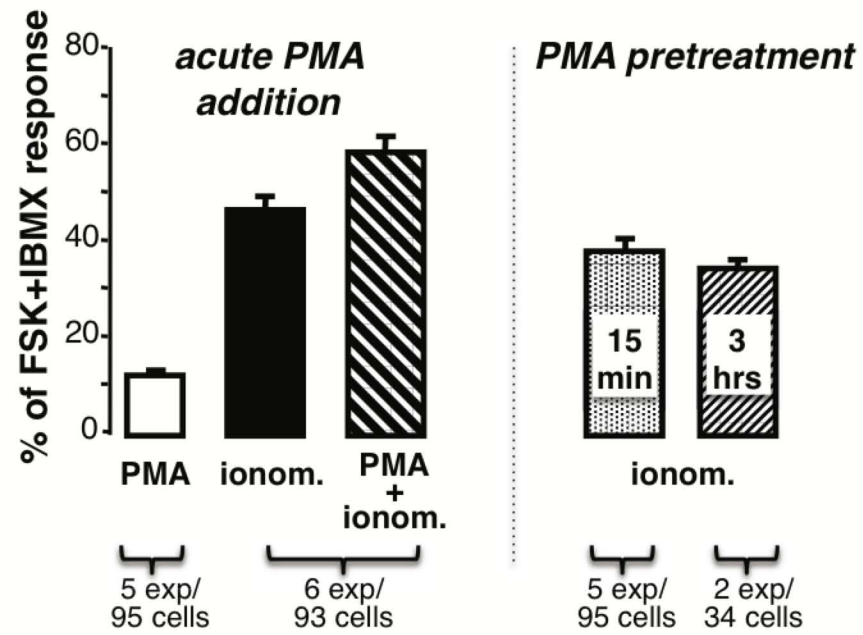

Supplement: NIHMS385628-supplement-Supp_Fig_S1-S4.pdf [file NIHMS385628-supplement-Supp_Fig_S1-S4.pdf]
